# Supplementary material
Source: Springer Nature journal article supplement (https://openaccess.sgul.ac.uk/id/eprint/118514/3/12889_2026_26668_MOESM2_ESM.docx)
Supplement: MOESM2 [file 12889_2026_26668_MOESM2_ESM.docx]

**Additional file 2** Structure of interview – informed by the Theoretical Domains Framework (TDF) and the Capability, Opportunity and Motivation Model of Behaviour (COM-B)

| **Intervention component** | **COM-B** | **TDF** | **Question** |
| --- | --- | --- | --- |
| Initial approach | Capability | Persuasion – using communication to induce positive or negative feelings/stimulate actions | You have already completed half a year of study, what do you think of the whole ENERGISED program?  Follow-up question   - What aspects did you like the most? Are there any aspects you didn’t like? - What do you think about Fitbit watch? |
| Motivation | Goals/beliefs about capabilities | You will have been recruited to take part in ENERGISED by your GP. How did you feel about being approached to take part in this study? |
| Do you think following the ENERGISED program has changed your activity levels?  Follow-up question   - What was the most motivational factor of all ENERGISED program to increase your PA for you? |
| Reflective motivation | Incentivisation – creating expectation of reward | What motivated you to take part in the study? |
| Physical opportunity/Social opportunity | Increasing means/reducing barriers to increase capability or opportunity | Were there any barriers to you engaging with the ENERGISED program? |
| Just-in-time messages received through smartphone | Psychological capability | Persuasion – using communication to induce positive or negative feelings/stimulate actions | How did you feel about receiving just-in-time messages on your smartphone to change your activity levels?  Follow-up questions  What are your thoughts on:   - The frequency of these messages? - The content of these messages? - The timing of these messages? |
|  | Reflective motivation | Incentivisation – creating expectation of reward | Follow-up questions   - To what extent their acceptance has affected your level of PA? |
| Other messages received through smartphone | Reflective motivation | Goals/beliefs about capabilities | How did you feel about being provided with weekly feedback on your goals?  Follow-up question   - Is there any other feedback you would have liked to have received? |
|  | Reflective motivation | Incentivisation – creating expectation of reward | To what extent did receiving feedback influence your activity levels? |
|  | Psychological capability | Education – increasing knowledge or understanding | As part of the intervention, you will have been sent educational notifications. What did you think about receiving these messages? |
| Interaction with phone counsellor | Physical opportunity | Environmental restructuring – changing the physical or social context | As part of the intervention, you will have received phone calls from a phone counsellor. Please can you give me a brief overview about the topics discussed during these calls.  Did you have conversations around how to find the best opportunity to increase physical activity?  On the back of this conversation how did you change your behaviour? |
| Reflective motivation | Goals/beliefs about capabilities | Did you set daily step goals with the phone counsellor?  How did this conversation go?  On the back of this conversation how did you change your behaviour? |
| Additional final questions | Psychological capability | Knowledge, attention, decision processes, behavioural regulation | Were there any occasions when you didn’t follow the ENERGISED program? What was the reason for this?  How much would you recommend this program to someone? |
| Reflective motivation | Goals/beliefs about capabilities | Would you like to continue the program long-term, even after the end of the program? |
| Physical opportunity/Social opportunity | Increasing means/reducing barriers to increase capability or opportunity | In your opinion, how could the ENERGISED program be improved? |
